# Supplementary material
Source: PubMed Central journal article supplement (PMC2819512)
Supplement: psb0411_1049SD1.pdf [file psb0411_1049SD1.pdf]

## SUPPLEMENTAL FIGURE 1

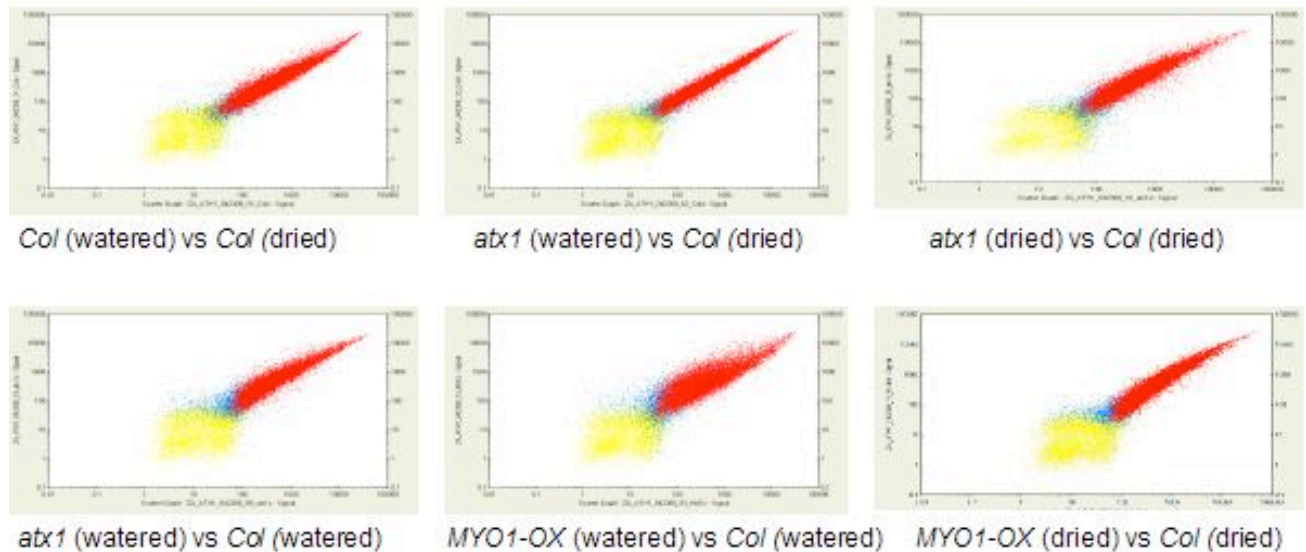

©2009 Landes Bioscience.

**Supplementary Figure 1.** Scatter plots comparing the signal intensities of two independent replicates of all samples analyzed for this study

Colored points represent different types of signal detections: yellow for A-A, A-M, M-A, M-M, blue for A-P, M-P, P-A, P-M, and red for P-P, where A means Absent, P means Present, M means Marginal signals.
